RESEARCH ARTICLE

# Natural convection heat transfer in an oscillating vertical cylinder

Ilyas Khan<sup>1\*</sup>, Nehad Ali Shah<sup>2</sup>, Asifa Tassaddiq<sup>3</sup>, Norzieha Mustapha<sup>4</sup>, Seripah Awang Kechil<sup>5</sup>

**1** Basic Engineering Sciences Department, College of Engineering Majmaah University, Majmaah, Saudi Arabia, **2** Abdus Salam School of Mathematical Sciences, GC University, Lahore, Pakistan, **3** College of Computer and Information Sciences, Majmaah University, Majmaah, Saudi Arabia, **4** Faculty of Computer and Mathematical Sciences, Universiti Teknologi MARA Kelantan, Machang, Kelantan, Malaysia, **5** Faculty of Computer and Mathematical Sciences, Universiti Teknologi MARA, UiTM Shah Alam, Malaysia

\* [i.said@mu.edu.sa](mailto:i.said@mu.edu.sa)

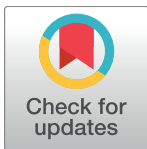

## Abstract

This paper studies the heat transfer analysis caused due to free convection in a vertically oscillating cylinder. Exact solutions are determined by applying the Laplace and finite Hankel transforms. Expressions for temperature distribution and velocity field corresponding to cosine and sine oscillations are obtained. The solutions that have been obtained for velocity are presented in the forms of transient and post-transient solutions. Moreover, these solutions satisfy both the governing differential equation and all imposed initial and boundary conditions. Numerical computations and graphical illustrations are used in order to study the effects of Prandtl and Grashof numbers on velocity and temperature for various times. The transient solutions for both cosine and sine oscillations are also computed in tables. It is found that, the transient solutions are of considerable interest up to the times  $t = 15$  for cosine oscillations and  $t = 1.75$  for sine oscillations. After these moments, the transient solutions can be neglected and, the fluid moves according with the post-transient solutions.

## OPEN ACCESS

**Citation:** Khan I, Ali Shah N, Tassaddiq A, Mustapha N, Kechil SA (2018) Natural convection heat transfer in an oscillating vertical cylinder. PLoS ONE 13(1): e0188656. <https://doi.org/10.1371/journal.pone.0188656>

**Editor:** Robert Planque, Vrije Universiteit Amsterdam, NETHERLANDS

**Received:** July 23, 2016

**Accepted:** September 22, 2017

**Published:** January 5, 2018

**Copyright:** © 2018 Khan et al. This is an open access article distributed under the terms of the [Creative Commons Attribution License](https://creativecommons.org/licenses/by/4.0/), which permits unrestricted use, distribution, and reproduction in any medium, provided the original author and source are credited.

**Data Availability Statement:** All relevant data are within the paper.

**Funding:** The first author acknowledges with thanks the Deanship of Scientific Research (DSR) at Majmaah University, Majmaah, Saudi Arabia, for technical and financial support through vote number 37/97 for this research project. The authors would like to thank the financial support received from the Ministry of Higher Education of Malaysia under the Fundamental Research Grant Scheme FRGS/1/2014/SG04/UiTM/02/1 and the Universiti Teknologi MARA. The funders had no

## Introduction

Energy transfer due to convection is of great importance and arises in many physical situations [1]. Amongst the three different types of convections (free, forced, mixed), mixed convection is less investigated as compare to the other two types. When forced and free convections occur together, mixed convection induces. This phenomenon is usually seen in the channel flow due to heating or cooling of the channel walls. Energy transfer due to mixed convection is studied under different physical situations with various boundary constraints. For example, Fan, et al. [2] analyzed energy transfer because of mixed convection in a horizontal channel filled with nanofluids. Aaiza et al. [3, 4] examined energy transfer due to mixed convection in channel flow for ferrofluid and nanofluid respectively. Aaiza et al. [4], further pointed out that in mixed convection energy transfer, the buoyancy force is responsible for free convection and at least one of the two, non-homogeneous boundary conditions on velocity or external pressure gradient results forced convection. Amongst the important studies on mixed convection energy transfer, we include here the attempts those made by Kumari et al. [5], Tiwari and Das

role in study design, data collection and analysis, decision to publish, or preparation of the manuscript.

**Competing interests:** The authors have declared that no competing interests exist.

[6], Chamkha et al. [7], Sheikhzadeh et al. [8], Prasad et al. [9], Hasnain et al. [10] and Ganapathirao et al. [11]. However, most of these studies on energy transfer were focused in simple geometrical configurations.

In contrast, the energy transfer due to convection flow in stationary or moving cylinder has numerous applications in engineering and geophysics, such as nuclear reactor cooling system and underground energy transport and hence attracted the attention of many researchers. However, this area of research is not as much studied as flow over a flat plate, channel flow, flow over sheets etc. Most probably, it is due to complex nature of these problems. Most of these studies were investigated in the absence of heat or heat and mass transfer, see for example the work of Fetecau et al. [12–14], Jamil and Fetecau [15], Rubab et al. [16] and Abdulhameed et al. [17]. Such problems have also applications in biomagnetic fluid dynamics, see for example Sharma et al. [18], and Nehad et al. [19], where they used cylindrical coordinates and investigated the blood flow in cylindrical shaped arteries. Khan et al. [20–22], used cylindrical coordinates and investigated heat or heat and mass transfer in converging and diverging channels.

Free convection in cylindrical shape geometry is investigated in several earlier studies such as Goldstein and Briggs [23], in 1964 studied transient free convection over vertical plates and circular cylinders. Bottemanne [24] provided experimental results for pure and simultaneous heat and mass transfer by free convection over a vertical cylinder. Chen and Yuh [25] studied combined heat and mass transfer in free convection flow along a vertical cylinder. Some other related studies on free convection flow in a cylinder are given in [26–30]. In recent investigations, Deka et al. [31] analyzed transient free convection flow past an accelerated vertical cylinder in a rotating fluid whereas Deka and Paul [32] investigated unsteady one-dimensional free convection flow over an infinite moving vertical cylinder in the presence of thermal stratification. They used Laplace transform technique and obtained the exact solutions, expressed them in the forms of complicated integrals. Other interesting problems are studied in references [33–39].

The aim of this paper is to study the energy transfer in a vertically oscillating cylinder due to natural convection. Exact solutions are obtained by means of Laplace and Hankel transforms for velocity and temperature. The transient solutions for both cosine and sine oscillations of the cylinder are computed in tabular forms. Results of Prandtl and Grashof numbers for different times are shown in graphs and discussed.

## Mathematical formulation and solution of the problem

Let us consider transient free convection flow of an incompressible viscous fluid in an infinite vertical cylinder of radius  $r_0$ . The  $z$ -axis is considered along the axis of cylinder in vertical upward direction and the radial coordinate  $r$  is taken normal to it. Initially at time  $t \leq 0$ , it is assumed that the cylinder is at rest and the cylinder and fluid are at the same temperature  $T_\infty$ . After time  $t = 0$ , the cylinder begins to oscillate along its axis and induces the motion in the fluid with velocity  $U_0 H(t) \exp(i\omega t)$ , where  $U_0$  is the characteristic velocity,  $H(t)$  is the unit step function and  $\omega$  is the frequency of oscillation. At the same time, the cylinder temperature raised to  $T_w$ , which is thereafter maintained constant (Fig 1). We assume that the velocity and temperature are the function of  $r$  and  $t$  only. For such a flow, the constraint of incompressibility is identically satisfied. It is also assumed that all the fluid properties are constant except for the density in the buoyancy term, which is given by the usual Boussinesq's approximation. In this paper, we have proposed to obtain analytical solutions for the temperature and velocity fields, in the negligible dissipation hypothesis. Under these assumptions, a well-defined

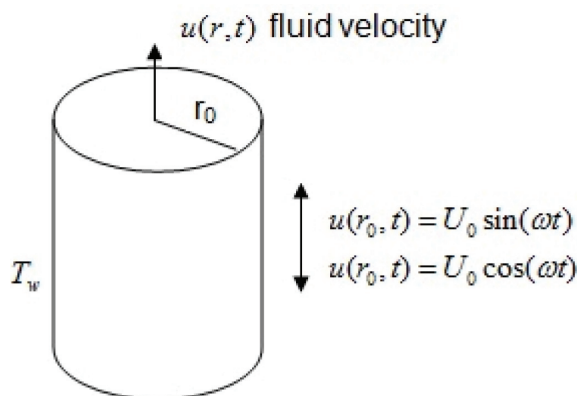

Fig 1. Fluid flow geometry.

<https://doi.org/10.1371/journal.pone.0188656.g001>

problem is modeled in terms of the following partial differential equations:

$$\frac{\partial^2 u(r, t)}{\partial r^2} + \frac{1}{r} \frac{\partial u(r, t)}{\partial r} - \frac{1}{v} \frac{\partial u(r, t)}{\partial t} + \frac{g\beta_T}{v} (T(r, t) - T_\infty) = 0; \quad r \in (0, r_0), t > 0, \quad (1)$$

$$\frac{\partial^2 T(r, t)}{\partial r^2} + \frac{1}{r} \frac{\partial T(r, t)}{\partial r} - \frac{1}{\alpha} \frac{\partial T(r, t)}{\partial t} = 0; \quad r \in (0, r_0), t > 0, \quad (2)$$

with appropriate initial and boundary conditions:

$$u(r, 0) = 0, \quad T(r, 0) = T_\infty; \quad r \in [0, r_0], \quad (3)$$

$$u(r_0, t) = U_0 H(t) \exp(i\omega t); \quad T(r_0, t) = T_w, \quad t > 0. \quad (4)$$

Introducing the following dimensionless variables:

$$t^* = \frac{tv}{r_0^2}, \quad r^* = \frac{r}{r_0}, \quad u^* = \frac{u}{U_0}, \quad \theta = \frac{T - T_\infty}{T_w - T_\infty}, \quad \omega^* = \frac{\omega r_0^2}{v}, \quad (5)$$

the governing Eqs (1)–(4) reduce to (dropping out the star notation):

$$\frac{\partial u(r, t)}{\partial t} = \frac{\partial^2 u(r, t)}{\partial r^2} + \frac{1}{r} \frac{\partial u(r, t)}{\partial r} + Gr\theta; \quad r \in (0, 1), \quad t > 0, \quad (6)$$

$$\frac{\partial \theta(r, t)}{\partial t} = \frac{1}{Pr} \left( \frac{\partial^2 \theta(r, t)}{\partial r^2} + \frac{1}{r} \frac{\partial \theta(r, t)}{\partial r} \right); \quad r \in (0, 1), \quad t > 0, \quad (7)$$

$$u(r, 0) = 0, \quad \theta(r, 0) = 0; \quad r \in [0, 1], \quad (8)$$

$$u(1, t) = H(t) \exp(i\omega t); \quad \theta(1, t) = 1, \quad t > 0, \quad (9)$$

where  $Gr = \frac{g\beta_T r_0^2 (T_w - T_\infty)}{U_0 v}$ ,  $Pr = \frac{v}{\alpha}$ .

## Calculation for temperature

Applying the Laplace transform to Eqs (7), (9)<sub>2</sub> and using the initial condition (8)<sub>2</sub>, we obtain the following transformed problem:

$$q\bar{\theta}(r, q) = \frac{1}{\text{Pr}} \left( \frac{\partial^2}{\partial r^2} + \frac{1}{r} \frac{\partial}{\partial r} \right) \bar{\theta}(r, q), \quad (10)$$

$$\bar{\theta}(1, q) = \frac{1}{q}, \quad (11)$$

where  $\bar{\theta}(r, q)$  is the Laplace transform of the function  $\theta(r, t)$  and  $q$  is the transform variable.

Applying the finite Hankel transform of order zero, to Eq (10), and using condition (11), we obtain:

$$\bar{\theta}_H(r_n, q) = \frac{J_1(r_n)}{r_n} \left( \frac{1}{q} - \frac{1}{q + \frac{r_n^2}{\text{Pr}}} \right), \quad (12)$$

where  $\bar{\theta}_H(r_n, q) = \int_0^1 r \bar{\theta}(r, q) J_0(r r_n) dr$  is the finite Hankel transform of the function  $\bar{\theta}(r, q)$

$r_n, n = 0, 1, \dots$  are the positive roots of the equation  $J_0(x) = 0$ ,  $J_0$  being the Bessel function of first kind and zero order.

Taking inverse Laplace transform of Eq (12), we obtain:

$$\theta_H(r_n, t) = \frac{J_1(r_n)}{r_n} - \frac{J_1(r_n)}{r_n} \exp\left(-\frac{r_n^2}{\text{Pr}} t\right). \quad (13)$$

Taking inverse Hankel transform, we obtain

$$\theta(r, t) = 1 - 2 \sum_{n=1}^{\infty} \frac{J_0(r r_n)}{r_n J_1(r_n)} \exp\left(-\frac{r_n^2}{\text{Pr}} t\right). \quad (14)$$

In order to study the heat transfer from the cylinder surface to the fluid, we determine the Nusselt number. This dimensionless number is defined as ratio of the convective heat transfer to the conductive heat transfer and is given by

$$Nu = -\left(\frac{\partial \theta(r, t)}{\partial r}\right)_{r=1} = 2 \sum_{n=1}^{\infty} \exp\left(-\frac{r_n^2}{\text{Pr}} t\right). \quad (15)$$

## Calculation for velocity

Applying the Laplace transform to Eqs (6), (9)<sub>1</sub>, and using the initial condition (8)<sub>1</sub>, we obtain

$$q\bar{u}(r, q) = \frac{\partial^2 \bar{u}(r, q)}{\partial r^2} + \frac{1}{r} \frac{\partial \bar{u}(r, q)}{\partial r} + Gr \bar{\theta}(r, q), \quad (16)$$

$$\bar{u}(1, q) = \frac{1}{q - i\omega}. \quad (17)$$

Applying finite Hankel transform to Eq (16) and using Eqs (12), (17), we have

$$\bar{u}_H(r_n, q) = \frac{1}{(q - i\omega)(q + r_n^2)} r_n J_1(r_n) + Gr \frac{J_1(r_n)}{r_n} \left[ \frac{1}{q(q + r_n^2)} - \frac{1}{(q + r_n^2)(q + \frac{r_n^2}{Pr})} \right], \quad (18)$$

where  $\bar{u}_H(r_n, q) = \int_0^1 r \bar{u}_H(r, q) J_0(rr_n) dr$  is the finite Hankel transform of the function  $\bar{u}(r, q)$ .

We consider

$$F_n(q) = \frac{r_n J_1(r_n)}{(q - i\omega)(q + r_n^2)} = \frac{r_n J_1(r_n)}{r_n^2 + i\omega} \frac{1}{q - i\omega} - \frac{r_n J_1(r_n)}{r_n^2 + i\omega} \frac{1}{q + r_n^2} = F_{1n}(q) + F_{2n}(q), \quad (19)$$

where

$$F_{1n}(q) = \frac{r_n J_1(r_n)}{r_n^2 + i\omega} \frac{1}{q - i\omega} = \frac{J_1(r_n)}{r_n} \frac{1}{q - i\omega} - \frac{J_1(r_n)}{r_n} \frac{\omega(\omega + ir_n^2)}{r_n^4 + \omega^2} \frac{1}{q - i\omega}, \quad (20)$$

$$F_{2n}(q) = -\frac{r_n J_1(r_n)}{r_n^2 + i\omega} \frac{1}{q + r_n^2} = -\frac{r_n J_1(r_n)(r_n^2 - i\omega)}{r_n^4 + \omega^2} \frac{1}{q + r_n^2}, \quad (21)$$

$$F_{3n}(q) = \frac{Gr J_1(r_n)}{r_n} \left[ \frac{1}{r_n^2} \left( \frac{1}{q} - \frac{1}{q + r_n^2} \right) - \frac{Pr}{r_n^2(1 - Pr)} \left( \frac{1}{q + r_n^2} - \frac{1}{q + \frac{r_n^2}{Pr}} \right) \right]. \quad (22)$$

Applying the inverse Laplace transform to Eqs (19), (20), (21) and (22), we obtain

$$f_n(t) = f_{1n}(t) + f_{2n}(t), \quad (23)$$

with

$$f_{1n}(t) = \frac{J_1(r_n)}{r_n} \exp(i\omega t) - \omega^2 \cos(\omega t) \frac{J_1(r_n)}{r_n(r_n^4 + \omega^2)} + \omega \sin(\omega t) \frac{r_n J_1(r_n)}{(r_n^4 + \omega^2)} - i \left[ \omega \cos(\omega t) \frac{r_n J_1(r_n)}{(r_n^4 + \omega^2)} + \omega^2 \sin(\omega t) \frac{J_1(r_n)}{r_n(r_n^4 + \omega^2)} \right], \quad (24)$$

$$f_{2n}(t) = -\frac{r_n^3 J_1(r_n)}{r_n^4 + \omega^2} \exp(-r_n^2 t) + i \frac{\omega r_n J_1(r_n)}{r_n^4 + \omega^2} \exp(-r_n^2 t) \quad (25)$$

$$f_{3n}(t) = \frac{Gr J_1(r_n)}{r_n^3} + \frac{Gr J_1(r_n)}{r_n^3(Pr - 1)} \exp(-r_n^2 t) - \frac{Gr Pr J_1(r_n)}{r_n^3(Pr - 1)} \exp\left(-\frac{r_n^2 t}{Pr}\right), \quad Pr \neq 1. \quad (26)$$

Applying the Laplace transform to Eq (18) and using Eqs (23)–(26), we obtain

$$\begin{aligned} u_H(r_n, t) = & \frac{J_1(r_n)}{r_n} \exp(i\omega t) - \omega^2 \cos(\omega t) \frac{J_1(r_n)}{r_n(r_n^4 + \omega^2)} + \omega \sin(\omega t) \frac{r_n J_1(r_n)}{(r_n^4 + \omega^2)} - \\ & - i \left[ \omega \cos(\omega t) \frac{r_n J_1(r_n)}{(r_n^4 + \omega^2)} + \omega^2 \sin(\omega t) \frac{J_1(r_n)}{r_n(r_n^4 + \omega^2)} \right] - \frac{r_n^3 J_1(r_n)}{r_n^4 + \omega^2} \exp(-r_n^2 t) + i \frac{\omega r_n J_1(r_n)}{r_n^4 + \omega^2} \exp(-r_n^2 t) + \\ & + \frac{Gr J_1(r_n)}{r_n^3} + \frac{Gr J_1(r_n)}{r_n^3(Pr - 1)} \exp(-r_n^2 t) - \frac{Gr Pr J_1(r_n)}{r_n^3(Pr - 1)} \exp\left(-\frac{r_n^2 t}{Pr}\right), \quad Pr \neq 1. \end{aligned} \quad (27)$$

Applying the inverse Hankel transform to Eq (27), we obtain:

$$u(r, t) = \exp(i\omega t) - 2\omega^2 \cos(\omega t) a_1(r) + 2\omega \sin(\omega t) b_1(r) - 2 \sum_{n=1}^{\infty} \frac{r_n^3 J_0(rr_n)}{(r_n^4 + \omega^2) J_1(r_n)} \exp(-r_n^2 t) + \frac{2Gr}{Pr-1} \sum_{n=1}^{\infty} \left[ \left( (Pr-1) + \exp(-r_n^2 t) - Pr \exp\left(-\frac{r_n^2 t}{Pr}\right) \right) \frac{J_0(rr_n)}{r_n^3 J_1(r_n)} \right] - i \left[ 2\omega \cos(\omega t) b_1(r) + 2\omega^2 \sin(\omega t) a_1(r) - 2\omega \sum_{n=1}^{\infty} \frac{r_n J_0(rr_n) \exp(-r_n^2 t)}{(r_n^4 + \omega^2) J_1(r_n)} \right], \quad Pr \neq 1, \quad (28)$$

$$\text{where } a_1(r) = \sum_{n=1}^{\infty} \frac{J_0(rr_n)}{r_n (r_n^4 + \omega^2) J_1(r_n)} \text{ and } b_1(r) = \sum_{n=1}^{\infty} \frac{r_n J_0(rr_n)}{(r_n^4 + \omega^2) J_1(r_n)}.$$

### Cosine oscillation

For cosine oscillations of cylinder, the velocity field is given as:

$$u_c(r, t) = u_{cp}(r, t) + u_{ct}(r, t), \quad (29)$$

with

$$u_{cp}(r, t) = [1 - 2\omega^2 a_1(r)] \cos(\omega t) + 2\omega b_1(r) \sin(\omega t) + 2Gr \sum_{n=1}^{\infty} \frac{J_0(rr_n)}{r_n^3 J_1(r_n)}, \quad (30)$$

$$u_{ct}(r, t) = \frac{2Gr}{Pr-1} \sum_{n=1}^{\infty} \left[ \frac{J_0(rr_n)}{r_n^3 J_1(r_n)} \left( \exp(-r_n^2 t) - Pr \exp\left(-\frac{r_n^2 t}{Pr}\right) \right) \right] - 2 \sum_{n=1}^{\infty} \frac{r_n^3 J_0(rr_n)}{(r_n^4 + \omega^2) J_1(r_n)} \exp(-r_n^2 t), \quad (31)$$

are the permanent solution, respectively, the transient solution of cosine oscillation.

### Sine oscillation

For sine oscillations of cylinder, the velocity field is given as:

$$u_s(r, t) = u_{sp}(r, t) + u_{st}(r, t), \quad (32)$$

with

$$u_{sp}(r, t) = [1 - 2\omega^2 a_1(r)] \sin(\omega t) + 2\omega b_1(r) \cos(\omega t), \quad (33)$$

$$u_{st}(r, t) = 2\omega \sum_{n=1}^{\infty} \left[ \frac{r_n J_0(rr_n)}{(r_n^4 + \omega^2) J_1(r_n)} \exp(-r_n^2 t) \right], \quad (34)$$

are the permanent solution, respectively, the transient solution of sine oscillation.

## Numerical results and discussions

In order to obtain some information on the fluid flow parameters and heat transfer, we have made numerical simulations using Mathcad software. The obtained results are presented in the graphs from Figs 2–5. Geometry of the problem is given in Fig 1.

We were interested, to analyze the influence of the Prandtl number on the temperature, Nusselt number and on fluid velocity. Also, the influence of the Grashof number on the fluid velocity was studied.

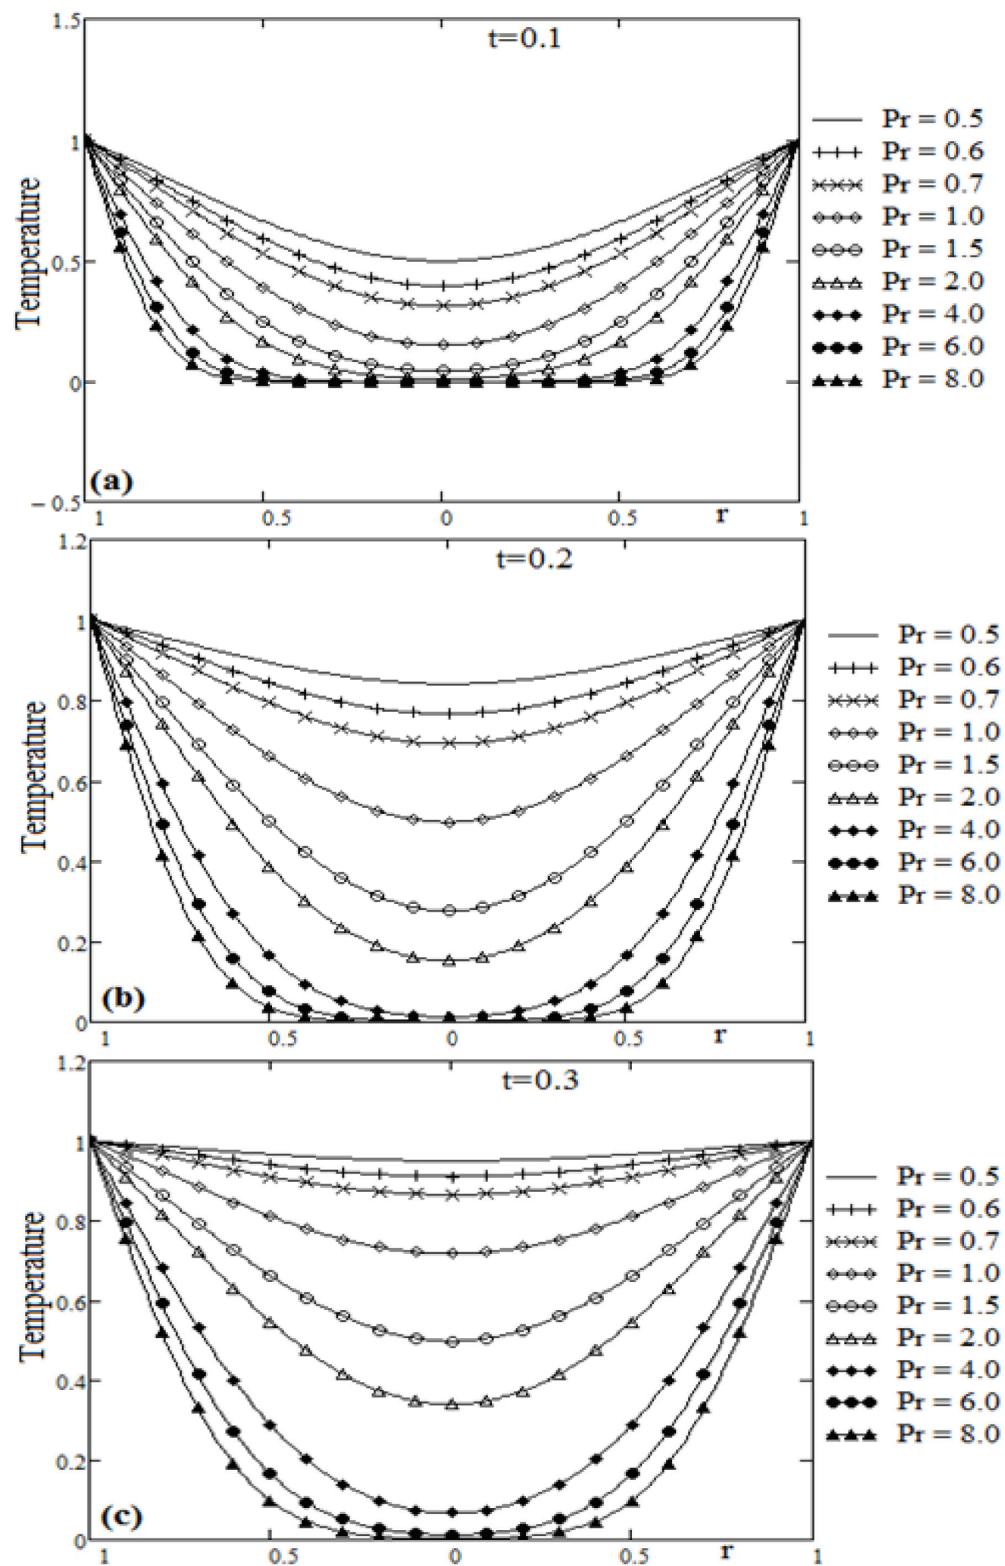

Fig 2. Profiles of temperature for Prandtl number  $Pr$  variation and different values of time  $t$ .

<https://doi.org/10.1371/journal.pone.0188656.g002>

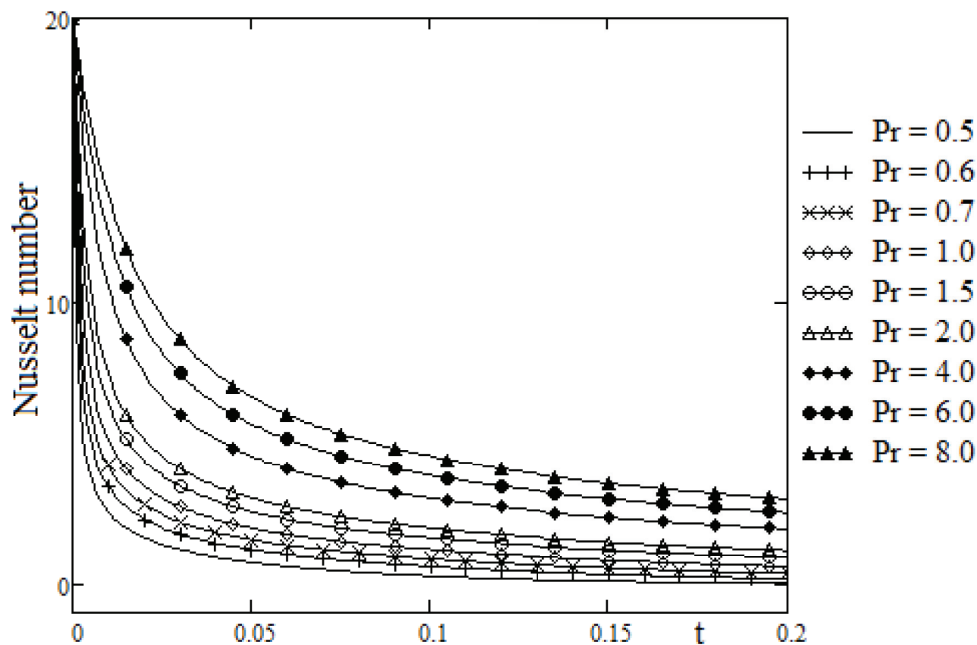

Fig 3. Variation of Nusselt number for different values of Pr.

<https://doi.org/10.1371/journal.pone.0188656.g003>

To evaluate numerical values of the temperature, Nusselt number and of the fluid velocity, we need the positive roots of the Bessel function  $J_0$ . These roots are generated by a numerical subroutine using Mathcad. All the parameters and profiles are dimensionless.

The diagrams of Fig 2 is plotted in order to discuss the influence of the Prandtl number  $Pr$ , on the fluid temperature. The curves corresponding to the dimensionless temperature  $\theta(r, t)$ , are sketched versus the radial coordinate  $r$ , for different values of the time  $t$  and Prandtl number  $Pr$ . It is clear from the temperature expression (14) that, the exponential term tends fast to zero for large time or, for small values of the Prandtl number. This is due to the fast increasing values of the positive roots of the function  $J_0(x)$ . It is observed from Fig 2 that, for values of the Prandtl number greater than 2, the fluid situated in the central area of the cylinder is not heated for small values of the time  $t$ . For small values of the Prandtl number the heat transfer from the cylinder surface to fluid is significant. Decrease in Prandtl number implies thickening of thermal boundary layer, therefore, the temperature gradient decreases with Prandtl.

Fig 3 shows the diagrams of the local Nusselt number  $Nu$  for different values of the Prandtl number  $Pr$ . The results are depicted versus time variable  $t$ . The remarkable effect of the Prandtl number is clear. When the number  $Pr$  is increased, the Nusselt number is increasing. At small values of the time  $t$ , the Nusselt number has big values, which means that, for small values of time  $t$ , the convection is very efficient. For large values of the time  $t$ , the conduction is dominant and, the heat transfer is produced only by conduction for very large values of the time  $t$  (for  $t \rightarrow \infty$ , the Nusselt number tends to zero).

The influence of Grashof number  $Gr$ , on the fluid velocity is shown in Fig 4. To draw the curves from Fig 4, we used values  $Pr = 0.7$  and  $\omega = 1.5$ . It must be emphasized that, for small values of Grashof number the fluid velocity has low values than in the case of large values of the Grashof number. This is due to the contribution of the temperature in the fluid velocity solution. Low values of the Grashof number lead to reduced contribution of the temperature in the fluid flow, therefore, the viscous forces increase and the velocity decreases.



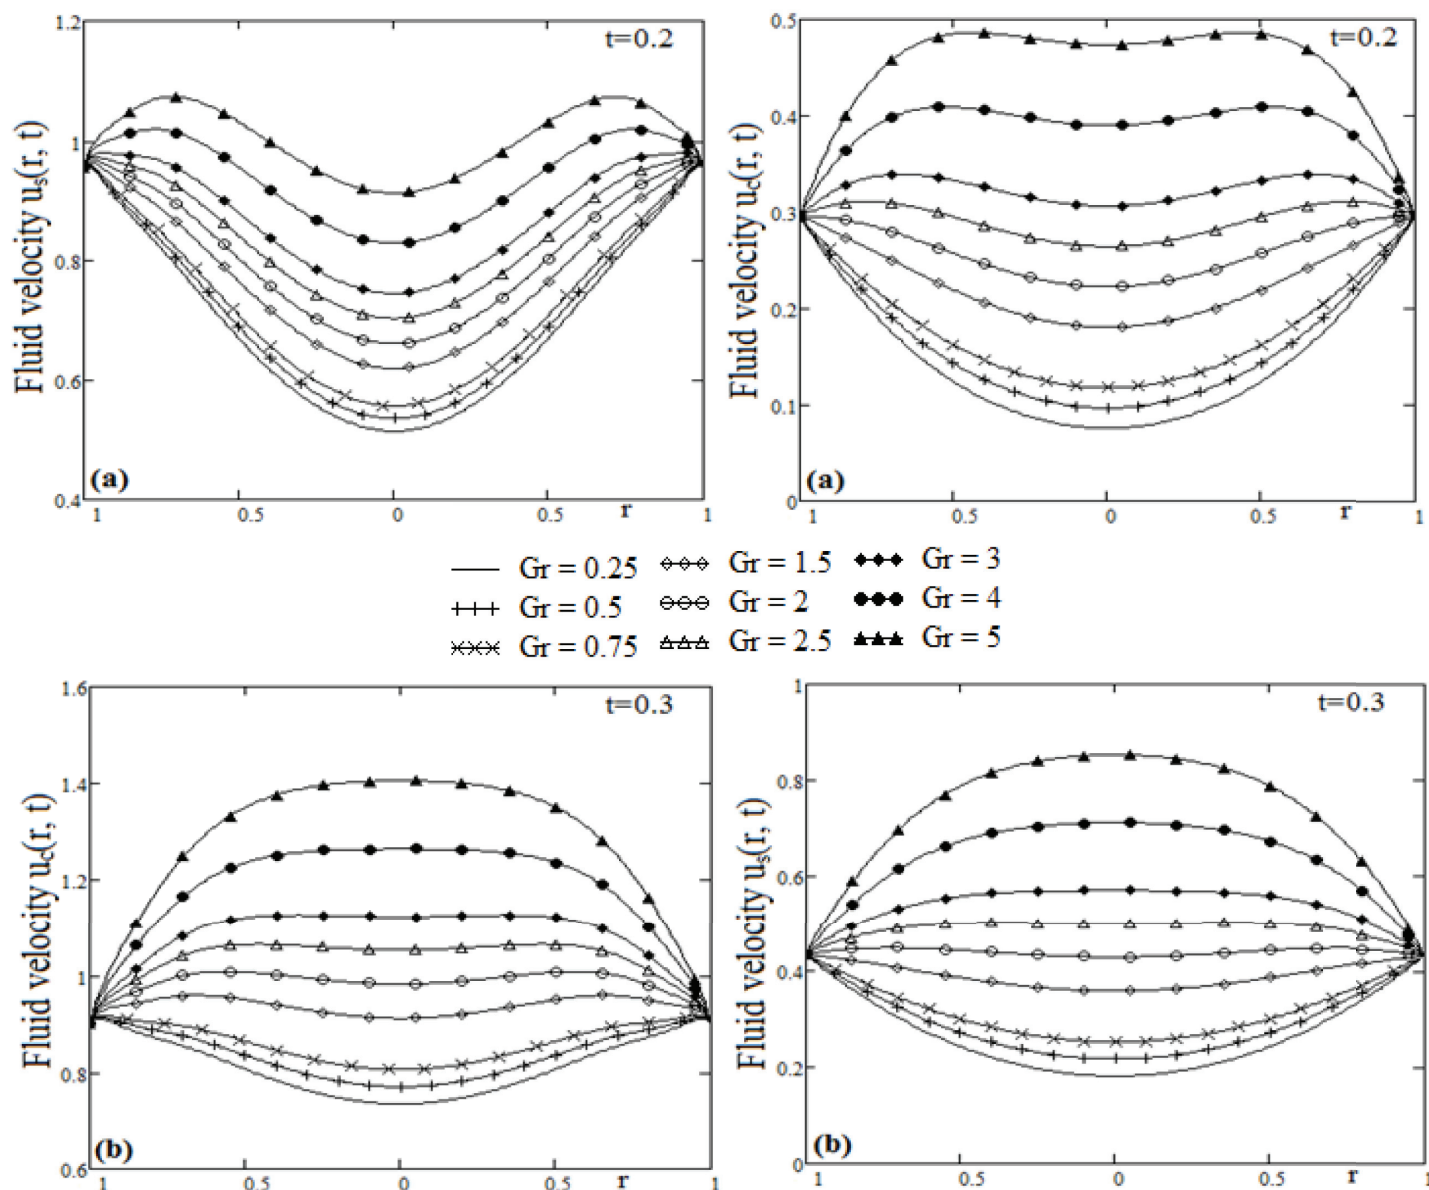

Fig 4. Profiles of velocity for cosine and sine oscillations for Grashof number  $Gr$  variation and different time  $t$ .

<https://doi.org/10.1371/journal.pone.0188656.g004>

Fig 5, was drawn in order to analyze the influence of the Prandtl number  $Pr$ , on the fluid velocity. Both cases of the plate oscillations were considered, namely cosine oscillations and sine oscillations. For Fig 5, we used values  $Gr = 1.5$  and  $\omega = 1.5$ . The buoyancy forces created by the density differences are high for the smaller values of the Prandtl number when the temperature is high. When the Prandtl number is large, the viscous damping action becomes bigger and fluid velocity decreases.

The decreasing of the transient solution  $u_{ct}(r, t)$ , given by Eq (31), is shown in the Table 1, for  $Gr = 5$ ,  $Pr = 7$  and  $\omega = 0.449$ . It is observed from Table 1 that, for  $t = 15$  the transient solution  $u_{ct}(r, t)$ , is of order  $10^{-6}$ , therefore, after this moment the transient solution can be neglected and, the fluid moves according with the post-transient solution.

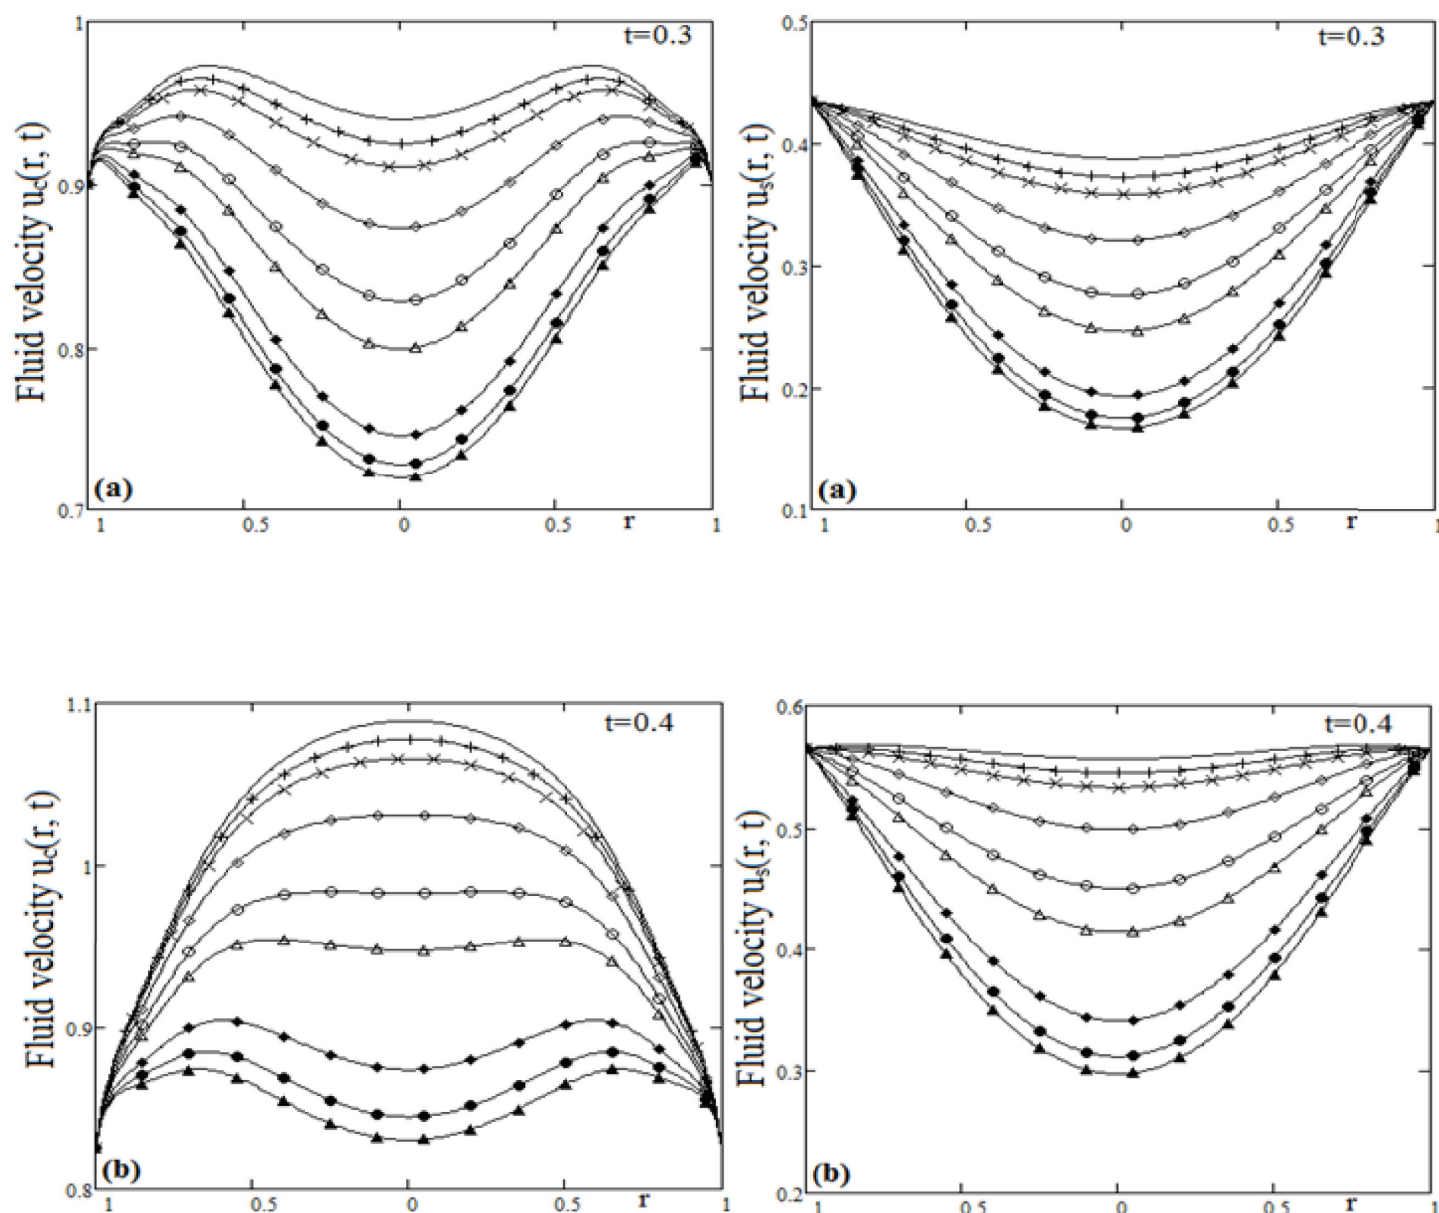

Fig 5. Profiles of velocity for cosine and sine oscillations for Prandtl number  $Pr$  variation and different time  $t$ .

<https://doi.org/10.1371/journal.pone.0188656.g005>

Similarly, in Table 2 is presented the decreasing with time  $t$  of the transient solution corresponding to the sine oscillations of the cylinder, given by Eq (34). Comparing with the cosine oscillations, it is seen that, the critical time at which the transient solution is of order  $10^{-6}$  is lower for sine oscillations. For the same values of the system parameters, the transient solution for sine oscillations can be neglected after the value  $t = 1.75$ .

## Conclusions

The problem of heat transfer due to free convection in an oscillating vertical cylinder is studied. Exact solutions for temperature and velocity are determined by applying the Laplace and

**Table 1.** Degreasing of the transient solution  $u_{ct}(r,t)$ , with the time  $t$ , for  $Gr = 5$ ,  $Pr = 7$  and  $\omega = 0.449$ .

| $r$ | $u_{ct}(r,0.5)$ | $u_{ct}(r,5)$             | $u_{ct}(r,15)$            |
|-----|-----------------|---------------------------|---------------------------|
| 0   | -0.60508        | -0.01298                  | $-3.35246 \times 10^{-6}$ |
| 0.1 | -0.59704        | -0.0128                   | $-3.30416 \times 10^{-6}$ |
| 0.2 | -0.57311        | -0.01224                  | $-3.16136 \times 10^{-6}$ |
| 0.3 | -0.53393        | -0.01135                  | $-2.93022 \times 10^{-6}$ |
| 0.4 | -0.48063        | -0.01015                  | $-2.62065 \times 10^{-6}$ |
| 0.5 | -0.41489        | $-8.69762 \times 10^{-3}$ | $-2.24591 \times 10^{-6}$ |
| 0.6 | -0.33902        | $-7.05552 \times 10^{-3}$ | $-1.82188 \times 10^{-6}$ |
| 0.7 | -0.25595        | $-5.29157 \times 10^{-3}$ | $-1.36639 \times 10^{-6}$ |
| 0.8 | -0.16916        | $-3.47889 \times 10^{-3}$ | $-8.98323 \times 10^{-6}$ |
| 0.9 | -0.08252        | $-1.69133 \times 10^{-3}$ | $-4.36737 \times 10^{-6}$ |
| 1   | 0               | 0                         | 0                         |

<https://doi.org/10.1371/journal.pone.0188656.t001>

**Table 2.** Degreasing of the transient solution  $u_{st}(r,t)$ , with the time  $t$ , for  $Gr = 5$ ,  $Pr = 7$  and  $\omega = 0.449$ .

| $r$ | $u_{st}(r,0.1)$          | $u_{st}(r,1)$            | $u_{st}(r,1.75)$         |
|-----|--------------------------|--------------------------|--------------------------|
| 0   | 0.06856                  | $3.80476 \times 10^{-4}$ | $4.97305 \times 10^{-6}$ |
| 0.1 | 0.06762                  | $3.74995 \times 10^{-4}$ | $4.90141 \times 10^{-6}$ |
| 0.2 | 0.06482                  | $3.58788 \times 10^{-4}$ | $4.68958 \times 10^{-6}$ |
| 0.3 | 0.06026                  | $3.32555 \times 10^{-4}$ | $4.34669 \times 10^{-6}$ |
| 0.4 | 0.0541                   | $2.97422 \times 10^{-4}$ | $3.88749 \times 10^{-6}$ |
| 0.5 | 0.04655                  | $2.54892 \times 10^{-4}$ | $3.33159 \times 10^{-6}$ |
| 0.6 | 0.03792                  | $2.06769 \times 10^{-4}$ | $2.70259 \times 10^{-6}$ |
| 0.7 | 0.02855                  | $1.55074 \times 10^{-4}$ | $2.02692 \times 10^{-6}$ |
| 0.8 | 0.01882                  | $1.01952 \times 10^{-4}$ | $1.33258 \times 10^{-6}$ |
| 0.9 | $0.16941 \times 10^{-3}$ | $4.9566 \times 10^{-5}$  | $6.47858 \times 10^{-7}$ |
| 1   | 0                        | 0                        | 0                        |

<https://doi.org/10.1371/journal.pone.0188656.t002>

finite Hankel transforms. The velocity solutions are arranged in transient and post-transient parts. Obtained analytical results were plotted and discussed. Transient solutions were computed in tables. The main points of this study are listed below:

- Increasing Prandtl number  $Pr$ , the temperature decreases. The Nusselt number increases if the Prandtl number increases.
- For small values of the time  $t$ , the convection is dominant, while, for large values of time  $t$  the heat transfer by conduction is dominant.
- Fluid velocity increasing with Grashof number but decreasing with Prandtl number.
- The transient solutions are significant up to the order of  $10^{-6}$ , and thereafter the fluid moves according with the post-transient solutions.

## Acknowledgments

The first author acknowledges with thanks the Deanship of Scientific Research (DSR) at Majmaah University, Majmaah, Saudi Arabia, for technical and financial support through vote number 37/97 for this research project. The authors would like to thank the financial support

received from the Ministry of Higher Education of Malaysia under the Fundamental Research Grant Scheme FRGS/1/2014/SG04/UiTM/02/1 and the Universiti Teknologi MARA.

## Author Contributions

**Conceptualization:** Ilyas Khan, Nehad Ali Shah, Norzieha Mustapha, Seripah Awang Kechil.

**Data curation:** Ilyas Khan, Nehad Ali Shah.

**Formal analysis:** Ilyas Khan, Nehad Ali Shah, Asifa Tassaddiq.

**Funding acquisition:** Ilyas Khan, Nehad Ali Shah, Asifa Tassaddiq, Norzieha Mustapha, Seripah Awang Kechil.

**Investigation:** Ilyas Khan, Nehad Ali Shah, Asifa Tassaddiq, Norzieha Mustapha, Seripah Awang Kechil.

**Methodology:** Ilyas Khan, Nehad Ali Shah, Asifa Tassaddiq, Norzieha Mustapha, Seripah Awang Kechil.

**Project administration:** Ilyas Khan.

**Resources:** Ilyas Khan, Nehad Ali Shah.

**Software:** Ilyas Khan, Nehad Ali Shah, Norzieha Mustapha, Seripah Awang Kechil.

**Supervision:** Ilyas Khan.

**Validation:** Ilyas Khan, Nehad Ali Shah.

**Visualization:** Ilyas Khan, Nehad Ali Shah, Asifa Tassaddiq, Norzieha Mustapha, Seripah Awang Kechil.

**Writing – original draft:** Ilyas Khan, Nehad Ali Shah, Asifa Tassaddiq, Norzieha Mustapha, Seripah Awang Kechil.

**Writing – review & editing:** Ilyas Khan, Nehad Ali Shah, Asifa Tassaddiq, Norzieha Mustapha, Seripah Awang Kechil.

## References

1. Haq R. U., Nadeem S., Khan Z. H., Noor N. F. M., Convective heat transfer in MHD slip flow over a stretching surface in the presence of carbon nanotubes, *Phys. B Condens. Matter* 457(2015) 40–47.
2. Fan T., X.U H., Pop I., Mixed convection heat transfer in horizontal channel filled with nanofluids, *International Journal of springer plus*, 34(2013), 339–350.
3. Aaiza Gul I. Khan S. Sharidan Asma. Khalid, A. Khan, Heat transfer in MHD mixed convection flow of a ferrofluid along a vertical channel, *PLoS ONE*. 10(11) (2015): e0141213. <https://doi.org/10.1371/journal.pone.0141213> PMID: 26550837
4. Aaiza Gul I. Khan, S. Shafi, Energy transfer in mixed convection MHD flow of nanofluid containing different shapes of nanoparticles in a channel filled with saturated porous medium. *Nanoscale Research Letters*, <https://doi.org/10.1186/s11671-015-1144-4> PMID: 26698873
5. Kumari M., Takhar H. S., Nath G. Mixed convection flow over a vertical wedge embedded in a highly porous medium. *Heat Mass Transf.* 2001. 37:139–146.
6. Tiwari R.K., Das M.K., Heat transfer augmentation in a two-sided lid-driven differentially heated square cavity utilizing nanofluids, *International Journal of Heat and Mass Transfer*, 50 (2007), 9–10.
7. Chamkha A. J., Rashad A. M., EL-Hakim M. A., Abdou M. M. M. Non-similar solutions for mixed convective boundary layer flow a non-Newtonian fluid over a wedge embedded an a Porous Medium Filled With a Nanofluid. *Int. J. Microscale Nanoscale Therm. Fluid Transp. Phenom.*, vol. 2, no. 4, pp. 323–341, 2011
8. Sheikhzadeh G. A., Hajjaligol N., Qomi M. E., Fattahi A., Laminar mixed convection of Cu-water nanofluid in two sided lid-driven enclosures, *Journal of Nanostructures*, 1 (2012), 44–53.

9. Prasad K. V., Datti P. S., Vajravelu K., MHD mixed convection flow over a permeable non-isothermal wedge, *J. King Saud Univ.—Sci.* 2013. 25(4):313–324.
10. Hasnain J., Abbas Z., Sajid M., Effects of porosity and mixed convection on MHD two phase fluid flow in an inclined channel, *PLoS One*. 2015 Mar 24; 10(3):e0119913. <https://doi.org/10.1371/journal.pone.0119913> PMID: 25803360
11. Ganapathirao M., Ravindran R., Momoniat E., Effects of chemical reaction, heat and mass transfer on an unsteady mixed convection boundary layer flow over a wedge with heat generation/absorption in the presence of suction or injection, *Int. J. Heat Mass Transf.* 2015. 51:289–300.
12. Fetecau C., Mahmood A., Corina Fetecau D. Vieru, Some exact solutions for the helical flow of a generalized Oldroyd-B fluid in a circular cylinder, *Computers and Mathematics with Applications* 56 (2008) 3096–3108.
13. Fetecau C., Mahmood A., Corina Fetecau D. Vieru, Some exact solutions for the helical flow of a generalized Oldroyd-B fluid in a circular cylinder, *Computers and Mathematics with Applications* 56 (2008) 3096–3108.
14. Fetecau C., Mahmood A., Jamil M., Exact solutions for the flow of a viscoelastic fluid induced by a circular cylinder subject to a time dependent shear stress, *Commun Nonlinear Sci Numer Simulat* 15 (2010) 3931–3938.
15. Jamil M., Fetecau C., Some exact solutions for rotating flows of a generalized Burgers' fluid in cylindrical domains, *J. Non-Newtonian Fluid Mech.* 165 (2010) 1700–1712.
16. Rubab Q., Husnine S. M., Mahmood A., Exact solutions of generalized Oldroyd-B fluid subject to a time-dependent shear stress in a pipe, *Journal of Prime Research in Mathematics* 5 (2009) 139–148.
17. Abdulhameed M., Vieru D. Roslan R., Shafie S., Analytical solutions of convective oscillating flow at a sinusoidal pressure waveform, *Meccanica*, <https://doi.org/10.1007/S11012-2016-0446-7>
18. Sharma S., Singh U., Katiyar V.K., Magnetic field effect on flow parameters of blood along with magnetic particles in a cylindrical tube, *Journal of Magnetism and Magnetic Materials* 377 (2015) 395–401.
19. Shah N. A., Vieru D., Fetecau C., Effects of the fractional order and magnetic field on the blood flow in cylindrical domains, *Journal of Magnetism and Magnetic Materials* 409 (2016) 10–19.
20. Khan U., Ahmed N., Sikander W., Mohyud-Din S. T., A study of velocity and temperature slip effects on flow of water based nanofluids in converging and diverging channels, *International Journal of Applied and Computational Mathematics*, 1 (4) (2015) 569–587.
21. Khan U., Ahmed N., Mohyud-Din S.T., Thermo-diffusion, diffusion-thermo and chemical reaction effects on MHD flow of viscous fluid in divergent and convergent channels, *Chemical Engineering Science*, 141 (2016) 17–27
22. Khan U., Ahmed N., Mohyud-Din S.T., Soret and Dufour effects on flow in converging and diverging channels with chemical reaction, *Aerospace Science and Technology*, 49 (2016) 135–143.
23. Goldstein R. J., Briggs D. G., Transient free convection about vertical plates and circular cylinders, *Trans. ASME J. Heat Transfer*, 86(1964) 490–500.
24. Bottemanne G. A., Experimental results of pure and simultaneous heat and mass transfer by free convection about a vertical cylinder for  $Pr = 0.71$  and  $Sc = 0.63$ , *Appl. Sci. Res.*, 25 (1972) 372–382.
25. Chen T. S., Yuh C. F., Combined heat and mass transfer in natural convection along a vertical cylinder, *Int. J. Heat Mass Transfer*, 23 (1980) 451–461.
26. Ganesan P., and Rani H. P., Transient natural convection along vertical cylinder with heat and mass transfer, *Heat Mass Transfer*, 33 (1998) 449–456.
27. Ganesan P., Loganathan P., Heat and mass flux effects on a moving vertical cylinder with chemically reactive species diffusion, *J. Eng. Phys. Thermophys.*, 75 (2002) 899–909.
28. Rani H. P., Transient natural convection along vertical cylinder with variable surface temperature and mass diffusion, *Heat Mass Transfer*, 40 (2003) 67–73.
29. Shapiro A., Fedorovich E., Natural convection in a stably stratified fluid along vertical plates and cylinders with temporarily periodic surface temperature variation, *J. Fluid Mech.*, 546 (2006) 295–311.
30. Loganathan P., Ganesan P., Numerical study of double-diffusive, free convective flow past moving vertical cylinder with chemically reactive species diffusion, *J. Eng. Phys. Thermophys.* 79(2006) 73–78.
31. Deka R. K., Paul A., Chaliha A., Transient free convection flow past an accelerated vertical cylinder in a rotating fluid, *Ain Shams Engineering Journal* 5 (2014) 505–513.
32. Deka R. K., Paul A., Transient free convection flow past an infinite moving vertical cylinder in a stably stratified fluid, *Journal of Heat Transfer*, 134 / 042503-1-8 (2012).
33. Khan Umar, Ahmed Naveed, Mohyud-Din Syed Tauseef, Analysis of magnetohydrodynamic flow and heat transfer of Cu–water nanofluid between parallel plates for different shapes of nanoparticles, *Neural Comput & Applic*, <https://doi.org/10.1007/s00521-016-2596-x>, (2016).

34. Kandelousi M. S., Ellahi R., Simulation of ferrofluid flow for magnetic drug targeting using the lattice boltzmann method, *Zeitschrift für Naturforschung A* 70 (2), (2015) 115–124
35. Sheikholeslami M., Ellahi R., Three dimensional mesoscopic simulation of magnetic field effect on natural convection of nanofluid, *International Journal of Heat and Mass Transfer* 89, (2015) 799–808
36. Sheikholeslami M., Ellahi R., Ashorynejad H. R., Domairry G., Hayat T., Effects of heat transfer in flow of nanofluids over a permeable stretching wall in a porous medium, *Journal of Computational and Theoretical Nanoscience* 11 (2), (2014) 486–496
37. Sheikholeslami M., Ellahi R., Electrohydrodynamic nanofluid hydrothermal treatment in an enclosure with sinusoidal upper wall, *Applied Sciences* 5 (3), (2014) 294–306
38. Zeeshan A., Ellahi R., Hassan M., Magnetohydrodynamic flow of water/ethylene glycol based nanofluids with natural convection through a porous medium, *The European Physical Journal Plus* 129 (12), (2014) 1–10
39. Ellahi R., Rahman S.U., Nadeem S., Blood flow of Jeffrey fluid in a catheterized tapered artery with the suspension of nanoparticles, *Physics Letters A* 378 (40), (2014) 2973–2980.
